# Supplementary material for: Metal chalcogenide electron extraction layers for nip-type tin-based perovskite solar cells
Source: PubMed Central journal article supplement — Nat Commun. 2024 Nov 1;15:9435. doi: 10.1038/s41467-024-53713-4 (PMC11530694; doi:10.1038/s41467-024-53713-4), 2024-11-01
Supplement: 41467_2024_53713_MOESM1_ESM.pdf [file 41467_2024_53713_MOESM1_ESM.pdf]

## Supplementary Information

### **Metal chalcogenide electron extraction layers for *nip*-type tin-based perovskite solar cells**

Tianpeng Li<sup>1,†</sup>, Bin Li<sup>2,†</sup>, Yingguo Yang<sup>3,4</sup>, Zuoming Jin<sup>1</sup>, Zhiguo Zhang<sup>1</sup>, Peilin Wang<sup>1</sup>, Liangliang Deng<sup>5</sup>, Yiqiang Zhan<sup>5</sup>, Qinghong Zhang<sup>2</sup>, Jia Liang<sup>1,\*</sup>

<sup>1</sup> Department of Materials Science and State Key Laboratory of Photovoltaic Science and Technology, Fudan University, 220 Handan Road, Shanghai 200433, China

<sup>2</sup> State Key Laboratory for Modification of Chemical Fibers and Polymer Materials, College of Materials Science and Engineering, Donghua University, Shanghai 201620, China

<sup>3</sup> School of Microelectronics, Fudan University, 220 Handan Road, Shanghai, 200433 China

<sup>4</sup> Shanghai Synchrotron Radiation Facility (SSRF), Shanghai Advanced Research Institute, Chinese Academy of Sciences, Shanghai, 201800 China

<sup>5</sup> Center of Micro-Nano System, School of Information Science and Technology, Fudan University, 220 Handan Road, Shanghai 200433, China

† These authors contributed equally: Tianpeng Li, Bin Li.

\* Email: [jialiang@fudan.edu.cn](mailto:jialiang@fudan.edu.cn)

## Contents

|    |                             |    |
|----|-----------------------------|----|
| 22 |                             |    |
| 23 | Supplementary Fig. 1 .....  | 4  |
| 24 | Supplementary Fig. 2 .....  | 5  |
| 25 | Supplementary Fig. 3 .....  | 6  |
| 26 | Supplementary Fig. 4 .....  | 7  |
| 27 | Supplementary Fig. 5 .....  | 8  |
| 28 | Supplementary Fig. 6 .....  | 9  |
| 29 | Supplementary Fig. 7 .....  | 10 |
| 30 | Supplementary Fig. 8 .....  | 11 |
| 31 | Supplementary Fig. 9 .....  | 12 |
| 32 | Supplementary Fig. 10 ..... | 13 |
| 33 | Supplementary Fig. 11 ..... | 14 |
| 34 | Supplementary Fig. 12 ..... | 15 |
| 35 | Supplementary Fig. 13 ..... | 16 |
| 36 | Supplementary Fig. 14 ..... | 17 |
| 37 | Supplementary Fig. 15 ..... | 18 |
| 38 | Supplementary Fig. 16 ..... | 19 |
| 39 | Supplementary Fig. 17 ..... | 22 |
| 40 | Supplementary Fig. 18 ..... | 23 |
| 41 | Supplementary Fig. 19 ..... | 24 |
| 42 | Supplementary Fig. 20 ..... | 25 |
| 43 | Supplementary Fig. 21 ..... | 26 |
| 44 | Supplementary Fig. 22 ..... | 27 |
| 45 | Supplementary Fig. 23 ..... | 28 |
| 46 | Supplementary Fig. 24 ..... | 29 |
| 47 | Supplementary Fig. 25 ..... | 30 |
| 48 | Supplementary Table 1 ..... | 31 |
| 49 | Supplementary Table 2 ..... | 32 |
| 50 | Supplementary Table 3 ..... | 33 |
| 51 | Supplementary Table 4 ..... | 34 |
| 52 | Supplementary Table 5 ..... | 35 |

|    |                                |    |
|----|--------------------------------|----|
| 53 | Supplementary References ..... | 36 |
| 54 |                                |    |
| 55 |                                |    |

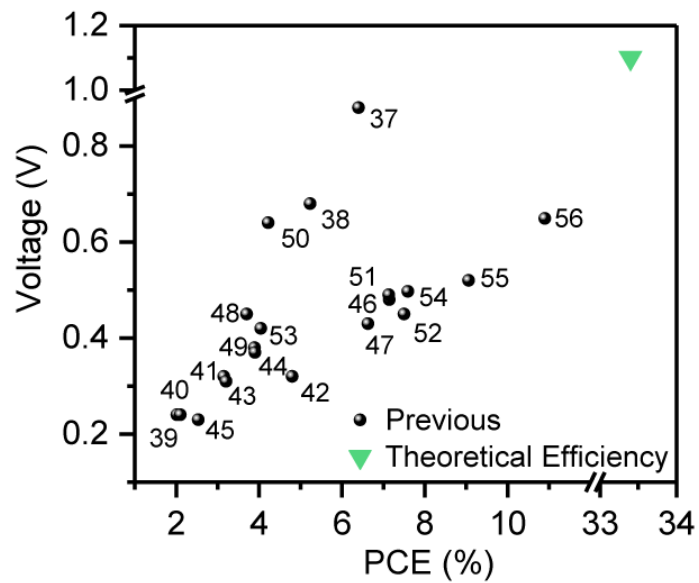

56

57 **Supplementary Fig. 1. Comparison between theoretical and experimental results.**

58 Statistics of the recently reported  $V_{OC}$  and PCE of *nip*-type TPSCs. The theoretical  
 59 values were also listed here for comparison.

60

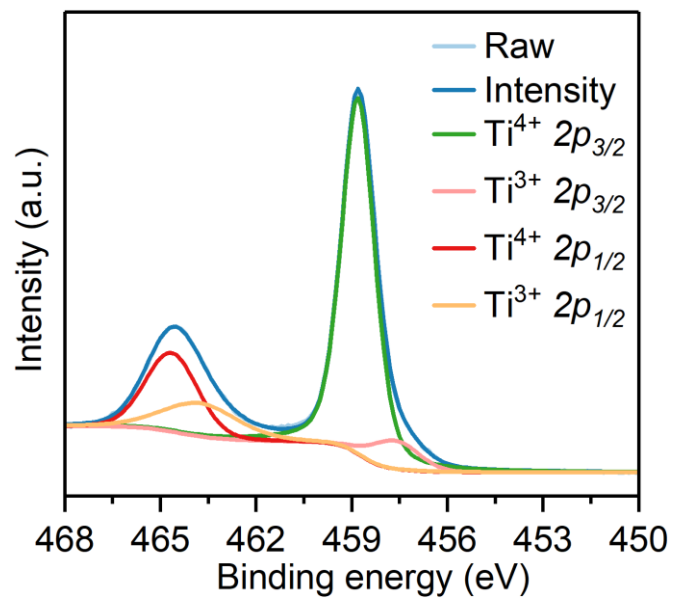

61

62 **Supplementary Fig. 2. XPS spectra.** High-resolution XPS sepctum in the Ti 2p region  
63 of the  $\text{TiO}_2$  ETL.

64

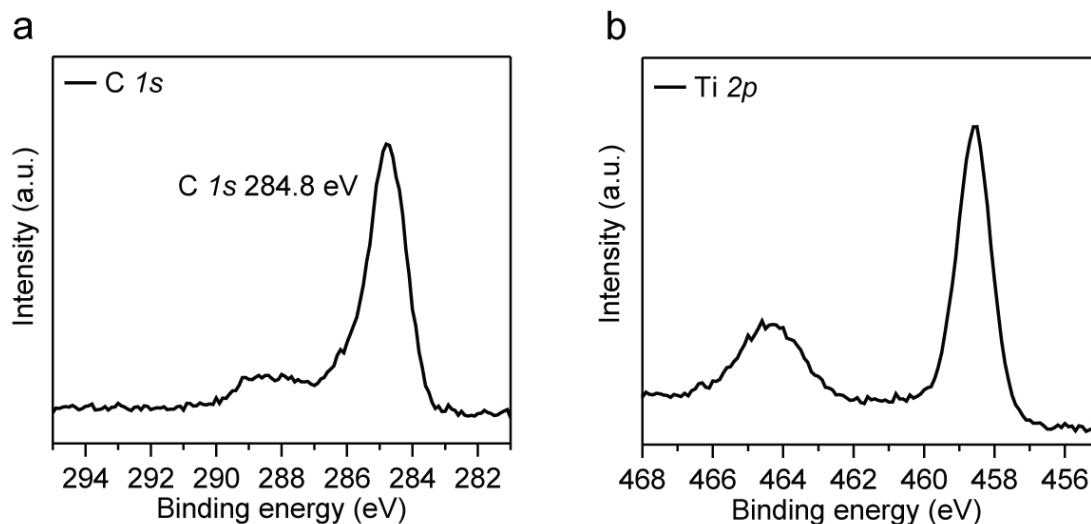

65

66 **Supplementary Fig. 3. XPS spectra.** High-resolution XPS spectra in the **a**, C 1s and

67 **b**, Ti 2p regions of the Sn-based perovskite films deposited on the TiO<sub>2</sub> ETL. The

68 concentration of precursor solution of the Sn-based perovskite is 0.1 M.

69

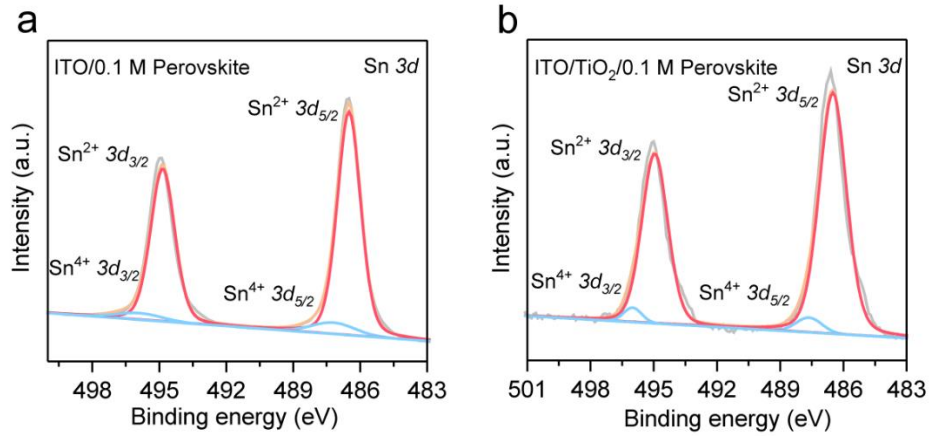

70

71 **Supplementary Fig. 4. XPS spectra.** High-resolution XPS spectra in the Sn 3d region  
 72 of fresh Sn-based perovskite layers deposited on **a**, ITO and **b**, ITO/TiO<sub>2</sub> substrates.

73

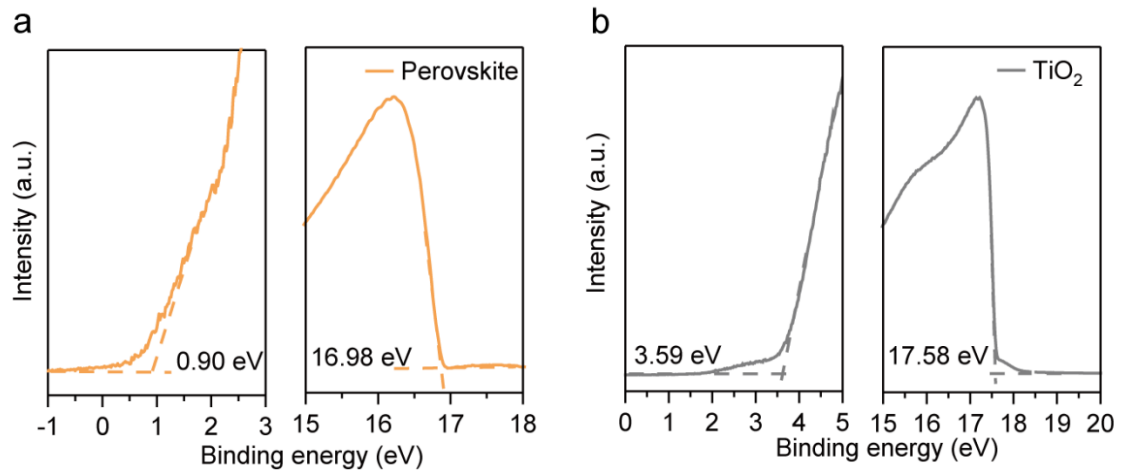

74

75 **Supplementary Fig. 5. UPS spectra.** UPS spectra of VBM onset and photoemission  
 76 cutoff energy boundary of **a**, Sn-based perovskites and **b**, TiO<sub>2</sub> ETLs.

77



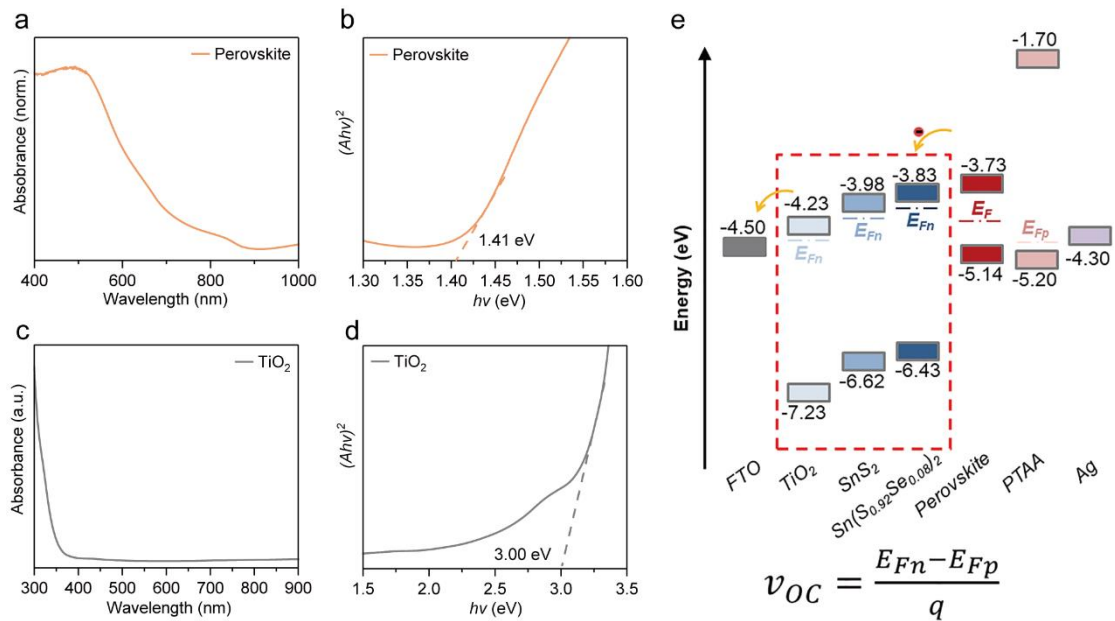

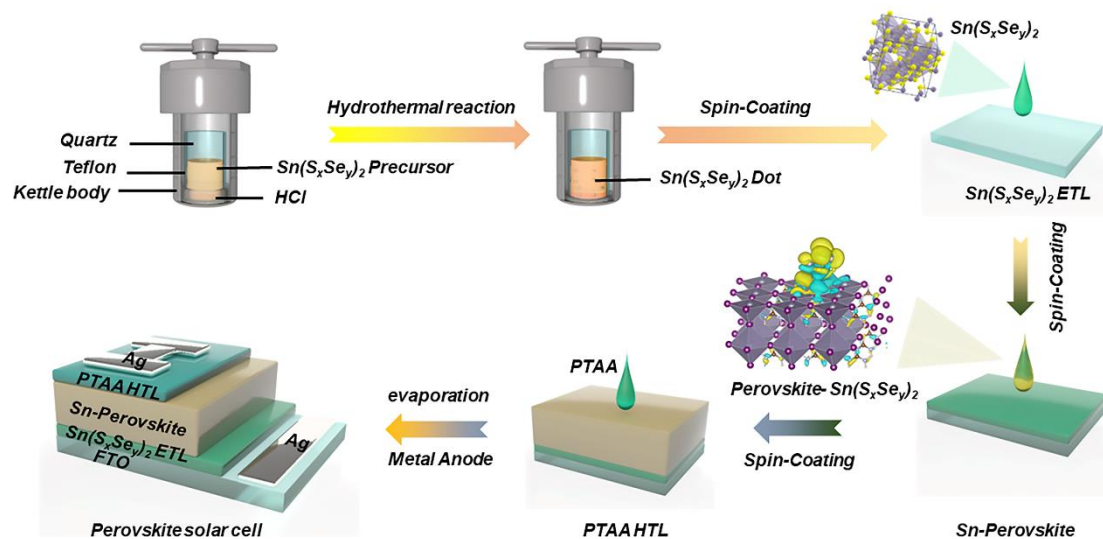

87

88 **Supplementary Fig. 7. Fabrication process.** Schematic diagram of the synthetic

89 process of the metal mixed-chalcogenide ETL ( $\text{Sn}(\text{S}_x\text{Se}_y)_2$ ) and the fabrication process

90 of the corresponding *nip*-type TPSCs.

91

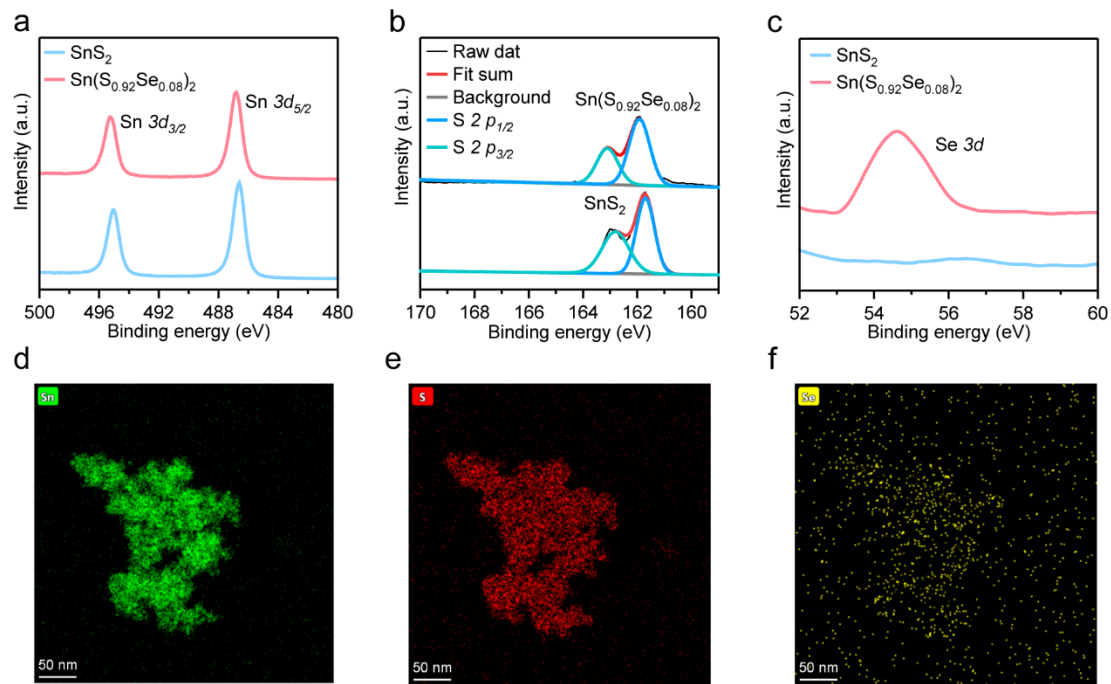

92  
 93  
 94  
 95  
 96  
 97  
 98  
 99

**Supplementary Fig. 8. Compositions of metal chalcogenide ETLs.** High resolution XPS spectra of the metal chalcogenide ETLs ( $\text{SnS}_2$  and  $\text{Sn}(\text{S}_{0.92}\text{Se}_{0.08})_2$ ) in the **a**, Sn 3d, **b**, S 2P, and **c**, Se 3d regions. Transmission electron microscope (TEM) energy dispersive X-ray spectroscopy (EDS) elemental mapping images of **d**, Sn, **e**, S, and **f**, Se elements in the  $\text{Sn}(\text{S}_{0.92}\text{Se}_{0.08})_2$  ETL.

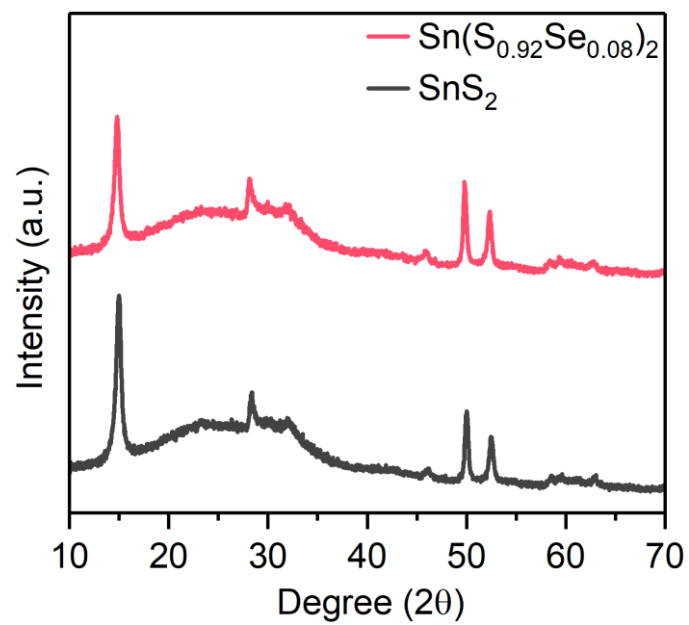

100

101 **Supplementary Fig. 9. XRD patterns.** Typical XRD patterns of  $\text{SnS}_2$  and

102  $\text{Sn}(\text{S}_{0.92}\text{Se}_{0.08})_2$  ETLs.

103

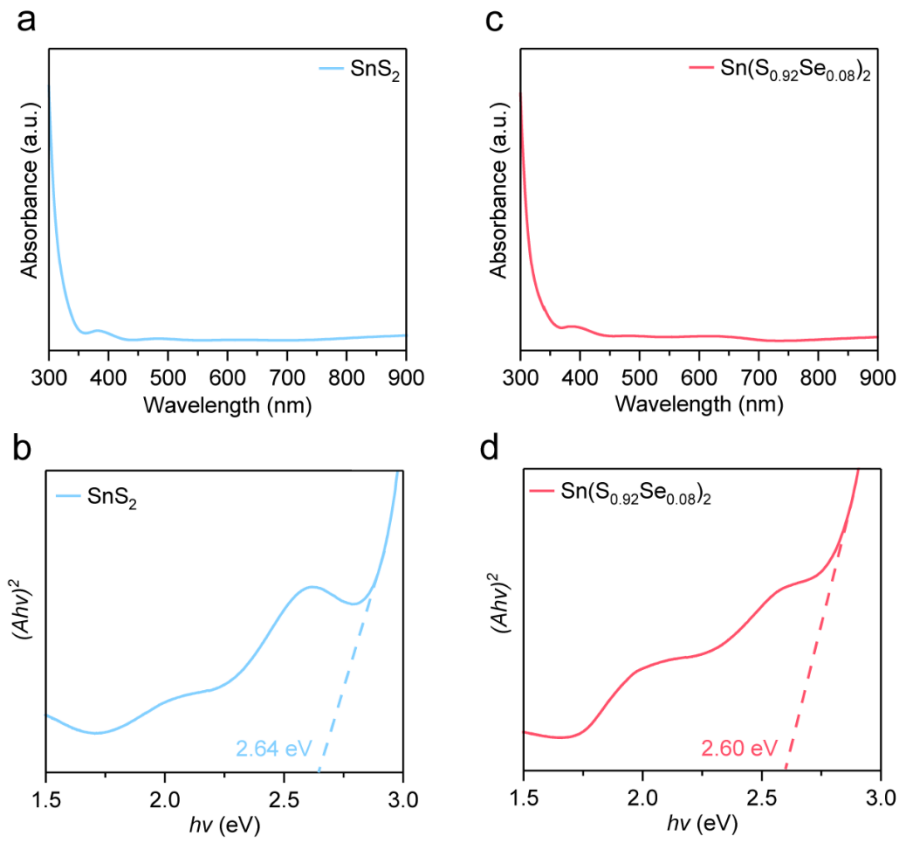

104

105 **Supplementary Fig. 10. UV-vis absorption spectra of metal chalcogenide ETLs.**

106 UV-vis absorption spectra of **a**, the SnS<sub>2</sub> ETL and **c**, the Sn(S<sub>0.92</sub>Se<sub>0.08</sub>)<sub>2</sub> ETL. The tauc

107 plots of **b**, the SnS<sub>2</sub> ETL and **d**, the Sn(S<sub>0.92</sub>Se<sub>0.08</sub>)<sub>2</sub> ETL derived from the corresponding

108 UV-vis absorption spectra.

109

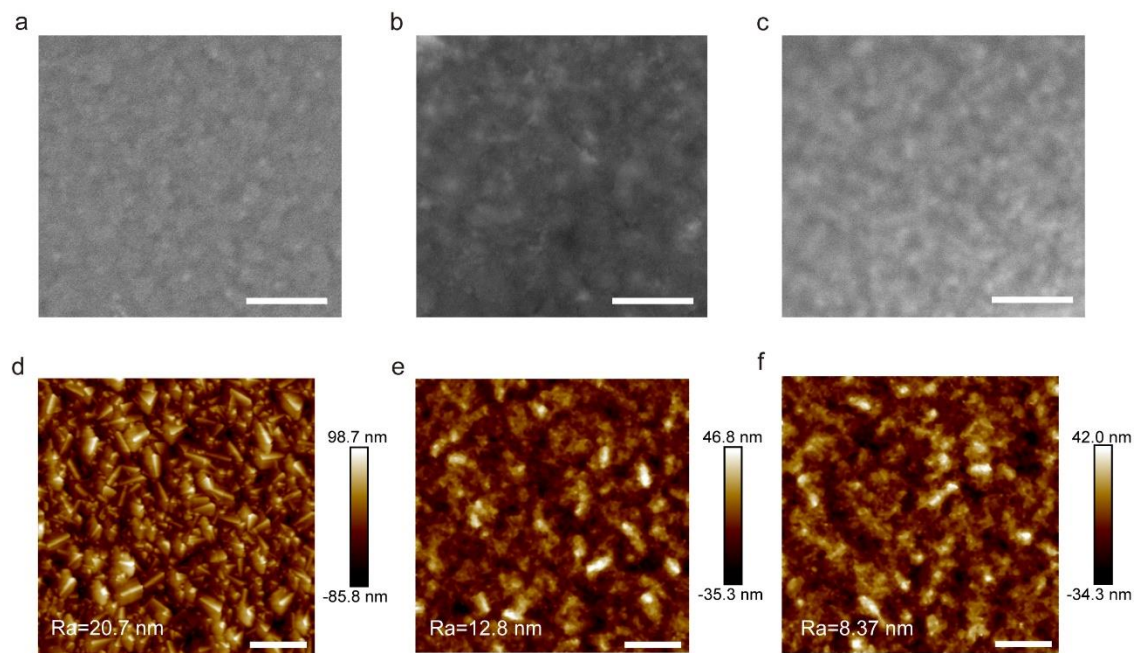

110

111 **Supplementary Fig. 11. Morphologies of metal chalcogenide ETLs.** Top-view SEM

112 images of **a**, TiO<sub>2</sub>, **b**, SnS<sub>2</sub> and **c**, Sn(S<sub>0.92</sub>Se<sub>0.08</sub>)<sub>2</sub> ETLs. The scalebars are 500 nm. AFM

113 images of **d**, TiO<sub>2</sub>, **e**, SnS<sub>2</sub> and **f**, Sn(S<sub>0.92</sub>Se<sub>0.08</sub>)<sub>2</sub> ETLs. The scalebars are 1  $\mu$ m.

114

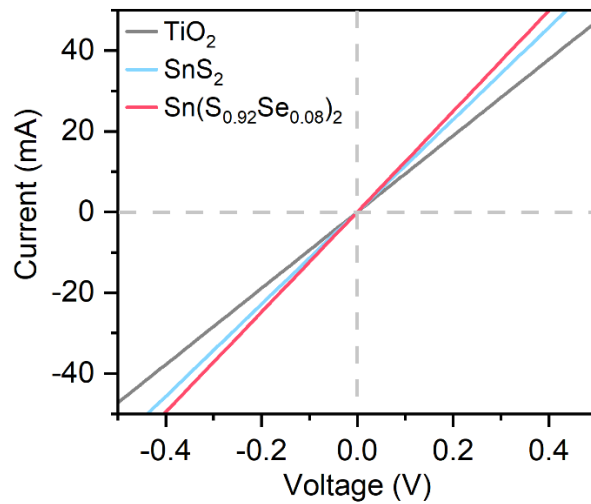

115

116 **Supplementary Fig. 12. Conductivities of metal chalcogenide ETLs.  $I$ - $V$**

117 characteristics of the TiO<sub>2</sub>, SnS<sub>2</sub> and Sn(S<sub>0.92</sub>Se<sub>0.08</sub>)<sub>2</sub> ETLs. The Sn(S<sub>0.92</sub>Se<sub>0.08</sub>)<sub>2</sub> ETL

118 reveals the highest conductivity of  $13.8 \times 10^{-3} \text{ S cm}^{-1}$  among the three types of ETLs.

119

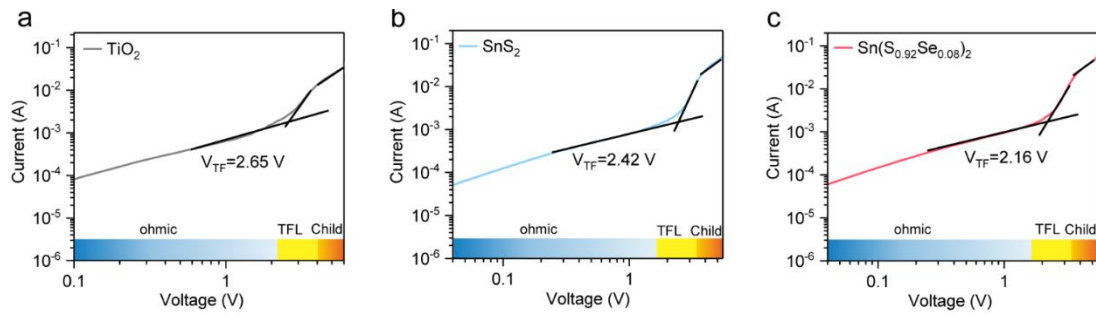

120

121 **Supplementary Fig. 13. Mobilities of metal chalcogenide ETLs.** SCLC spectra of  
 122 the device with the structure of FTO/Ag/ETL/Ag, the ETLs are **a**,  $TiO_2$ , **b**,  $SnS_2$  and **c**,  
 123  $Sn(S_{0.92}Se_{0.08})_2$  films respectively.

124



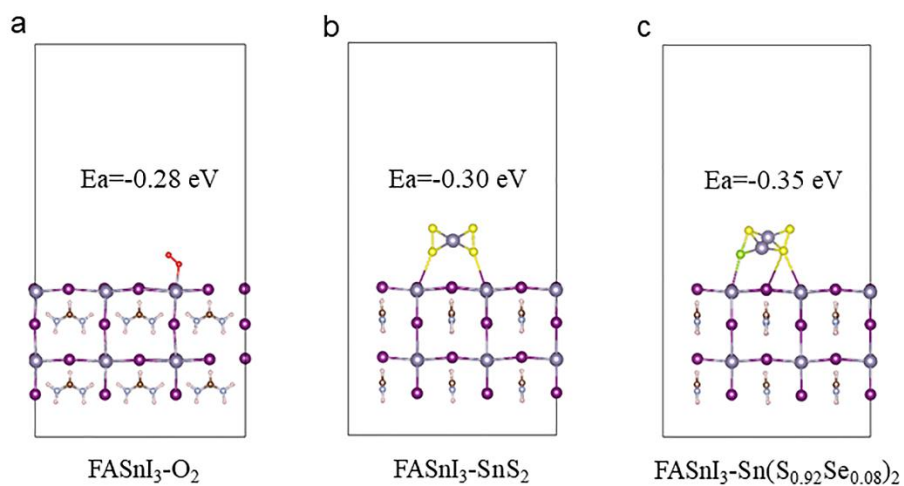

125

126 **Supplementary Fig. 14. DFT results.** The adsorption energy of the Sn-based

127 perovskites reacting with **a**, O<sub>2</sub>, **b**, SnS<sub>2</sub> and **c**, Sn(S<sub>0.92</sub>Se<sub>0.08</sub>)<sub>2</sub> molecules, respectively.

128

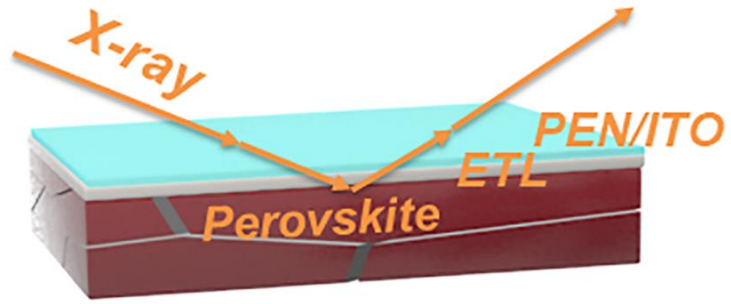

129

130 **Supplementary Fig. 15.** Schematic diagram of the testing mode of illuminating from  
131 the back side of the Sn-based perovskite films deposited on PEN/ITO/ETL substrates.

132

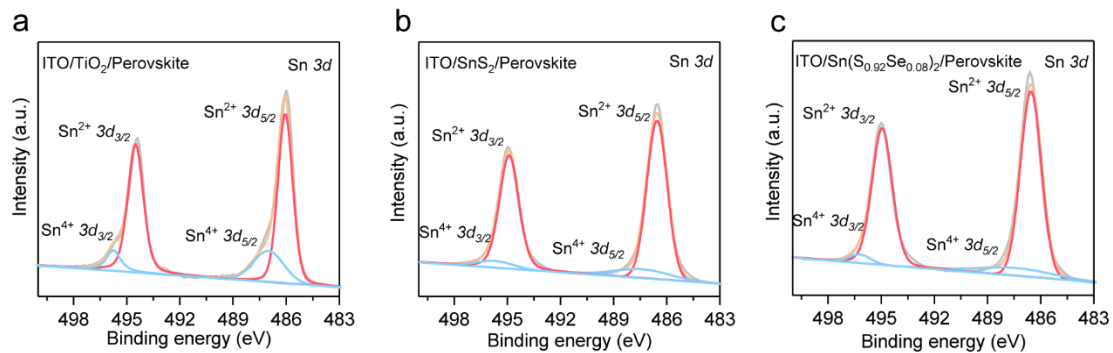

133

134 **Supplementary Fig. 16. XPS spectra.** High-resolution XPS spectra in Sn 3d regions  
 135 of 2 weeks-aged Sn-based perovskite films deposited on different ETLs, including **a**,  
 136 **TiO<sub>2</sub>**, **b**, **SnS<sub>2</sub>** and **c**, **Sn(S<sub>0.92</sub>Se<sub>0.08</sub>)<sub>2</sub>** ETLs.

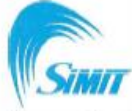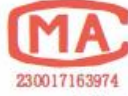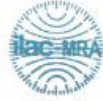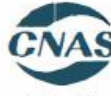

中国认可  
国际互认  
检测  
TESTING  
CNAS L8490

Test and Calibration Center of New Energy Device and Module,  
Shanghai Institute of Microsystem and Information Technology,  
Chinese Academy of Sciences (SIMIT)

## Measurement Report

Report No. 23TR101301

**Client Name** Fudan University

---

**Client Address** Handan Rd.220, 200433, Shanghai, China

---

**Sample** Se-SnS<sub>2</sub>/Sn perovskite solar cell

---

**Manufacturer** FDU, Jia Liang Group

---

**Measurement Date** 13<sup>th</sup> October, 2023

---

**Performed by:** Qiang Shi *Qiang Shi* **Date:** 13/10/2023

**Reviewed by:** Wenjie Zhao *Wenjie Zhao* **Date:** 13/10/2023

**Approved by:** Yucheng Liu *Yucheng Liu* **Date:** 13/10/2023

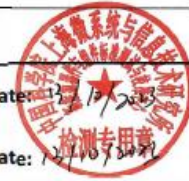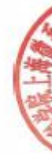

**Address:** No.235 Chengbei Road, Jiading, Shanghai **Post Code:**201800

**E-mail:** solarcell@mail.sim.ac.cn **Tel:** +86-021-69976921

The measurement report without signature and seal are not valid.  
This report shall not be reproduced, except in full, without the approval of SIMIT.

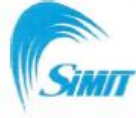

| Sample Information      |                                               |
|-------------------------|-----------------------------------------------|
| Sample Type             | Se-SnS <sub>2</sub> /Sn perovskite solar cell |
| Serial No.              | Se-SnS2-1#                                    |
| Lab Internal No.        | 23101301-1#                                   |
| Measurement Item        | I-V characteristic                            |
| Measurement Environment | 24.8 ± 2.0°C, 46.9 ± 5.0%RH                   |

| Measurement of I-V characteristic                        |                                                                                                                                                                                                                                                 |
|----------------------------------------------------------|-------------------------------------------------------------------------------------------------------------------------------------------------------------------------------------------------------------------------------------------------|
| Reference cell                                           | PVM 1121                                                                                                                                                                                                                                        |
| Reference cell Type                                      | mono-Si, WPVS, calibrated by NREL (Certificate No. ISO 2075)                                                                                                                                                                                    |
| Calibration Value/Date of Calibration for Reference cell | 144.53mA/ Feb. 2023                                                                                                                                                                                                                             |
| Measurement Conditions                                   | Standard Test Condition (STC):<br>Spectral Distribution: AM1.5 according to IEC 60904-3 Ed.3,<br>Irradiance: 1000 ± 50W/m <sup>2</sup> , Temperature: 25 ± 2°C                                                                                  |
| Measurement Equipment/ Date of Calibration               | AAA Steady State Solar Simulator (YSS-T155-2M) / July,2023<br>IV test system (ADCMT 6246) / June. 2023<br>SR Measurement system (CEP-25ML-CAS) / April,2023<br>Measuring Microscope (MF-B2017C) / July,2023                                     |
| Measurement Method                                       | I-V Measurement:<br>Logarithmic sweep in both directions (Isc to Voc and Voc to Isc) during one flash based on IEC 60904-1:2020;<br>Spectral Mismatch factor was calculated according to IEC 60904-7 and I-V correction according to IEC 60891; |
| Measurement Uncertainty                                  | Area: 1.0%(k=2); Isc: 1.9%(k=2); Voc: 1.0%(k=2);<br>Pmax: 2.3%(k=2); Eff: 2.5%(k=2)                                                                                                                                                             |

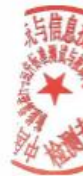

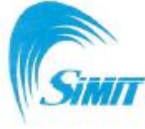

====Measurement Results====

|      | Forward Scan<br>(Isc to Voc) | Reverse Scan<br>(Voc to Isc) |
|------|------------------------------|------------------------------|
| Area | 3.98 mm <sup>2</sup>         |                              |
| Isc  | 0.805 mA                     | 0.811 mA                     |
| Voc  | 0.709 V                      | 0.702 V                      |
| Pmax | 0.404 mW                     | 0.421 mW                     |
| Ipm  | 0.700 mA                     | 0.737 mA                     |
| Vpm  | 0.576 V                      | 0.571 V                      |
| FF   | 70.74 %                      | 73.94 %                      |
| Eff  | 10.14 %                      | 10.57 %                      |

- Spectral Mismatch Factor: SMM=0.9938.
- Designated illumination area defined by a thin metal mask was measured by measuring microscope.
- Test results listed in this measurement report refer exclusively to the mentioned measured sample.
- The results apply only at the time of the test, and do not imply future performance.

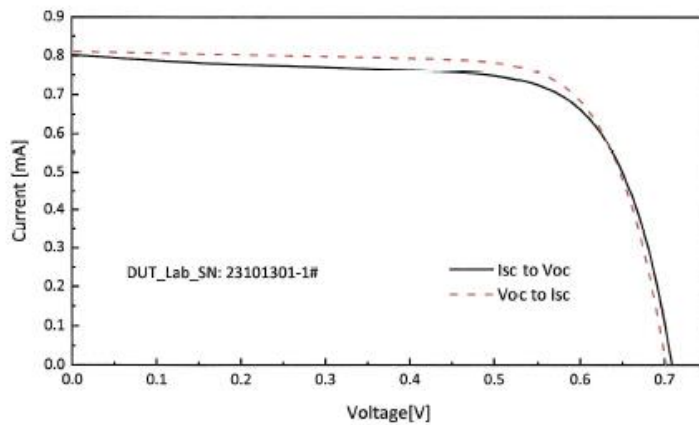

Fig.1 I-V curves of the measured sample

-----End of Report-----

139

140 **Supplementary Fig. 17. Photovoltaic performance.** Certified performance of the nip-  
141 type TPSC with the Sn(S<sub>0.92</sub>Se<sub>0.08</sub>)<sub>2</sub> ETL. The certified efficiency is 10.57% under  
142 reverse scannign mode with short-circuit current ( $I_{sc}$ ) = 0.81 mA,  $V_{oc}$  = 0.70 V and  $FF$   
143 = 73.94%.

144

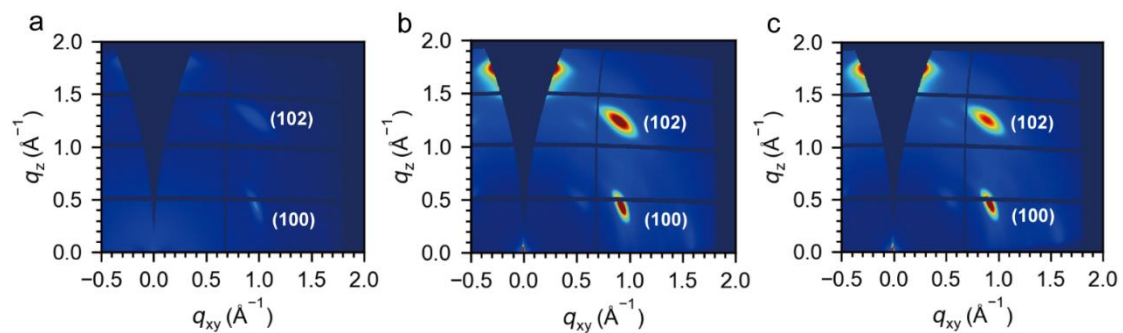

145

146

**Supplementary Fig. 18. GIWAXS characterization.** GIWAXS patterns of Sn-based

147

perovskite layers grown on **a**,  $\text{TiO}_2$ , **b**,  $\text{SnS}_2$ , and **c**,  $\text{Sn}(\text{S}_{0.92}\text{Se}_{0.08})_2$  ETLs.

148

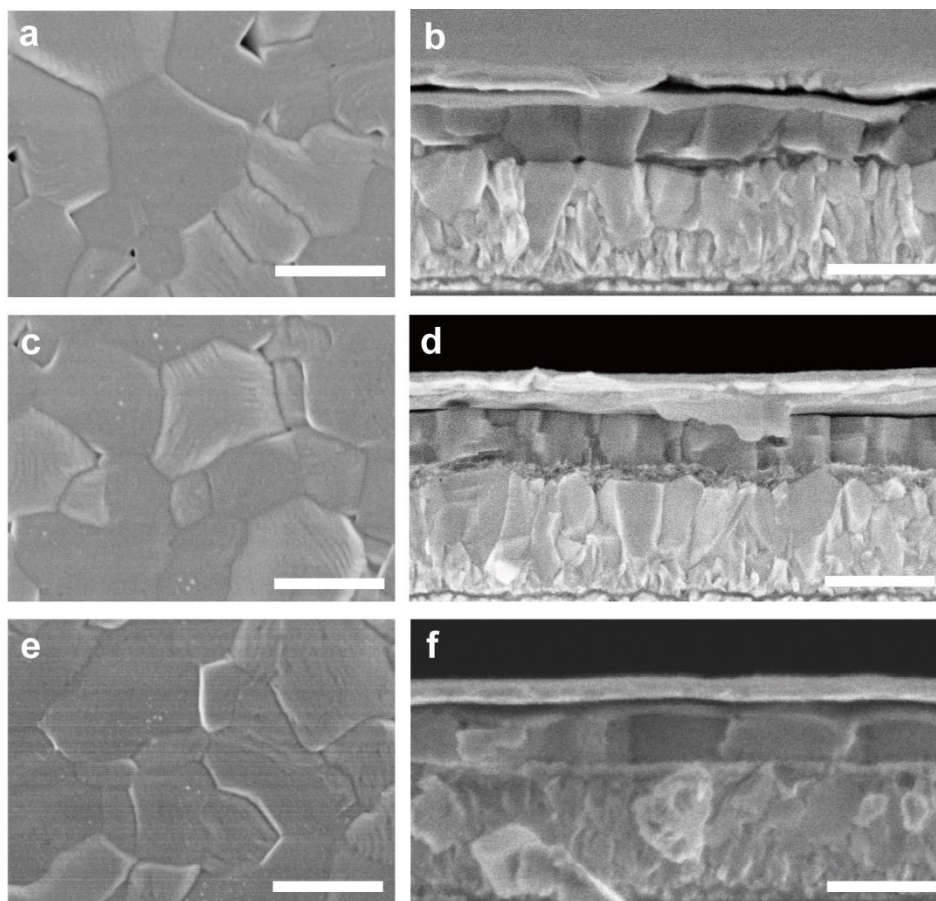

149

150 **Supplementary Fig. 19. SEM characterizations.** Top-view SEM images of the

151 perovskite based on **a**, TiO<sub>2</sub>, **c**, SnS<sub>2</sub>, and **e**, Sn(S<sub>0.92</sub>Se<sub>0.08</sub>)<sub>2</sub> ETLs. The scalebars are

152 500 nm. Cross-sectional SEM images of *nip*-type TPSCs with **b**, TiO<sub>2</sub>, **d**, SnS<sub>2</sub>, and **f**,

153 Sn(S<sub>0.92</sub>Se<sub>0.08</sub>)<sub>2</sub> ETLs. The scalebars are 500 nm.

154

155



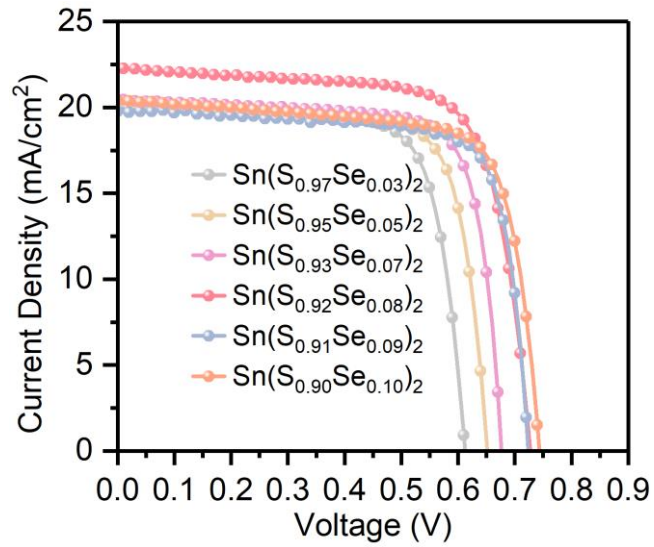

156

157 **Supplementary Fig. 20. Photovoltaic performances.** Photovoltaic performance of the  
 158 *nip*-type TPSCs based on Sn(S<sub>x</sub>Se<sub>y</sub>)<sub>2</sub> (x+y=1, y = 0.03, 0.05, 0.07, 0.08, 0.09, and 0.10).  
 159 With the increase of the concentration of Se, the PCEs increased first and then  
 160 decreased and the *nip*-type TPSC with the Sn(S<sub>0.92</sub>Se<sub>0.08</sub>)<sub>2</sub> ETL shows the best  
 161 performance.

162

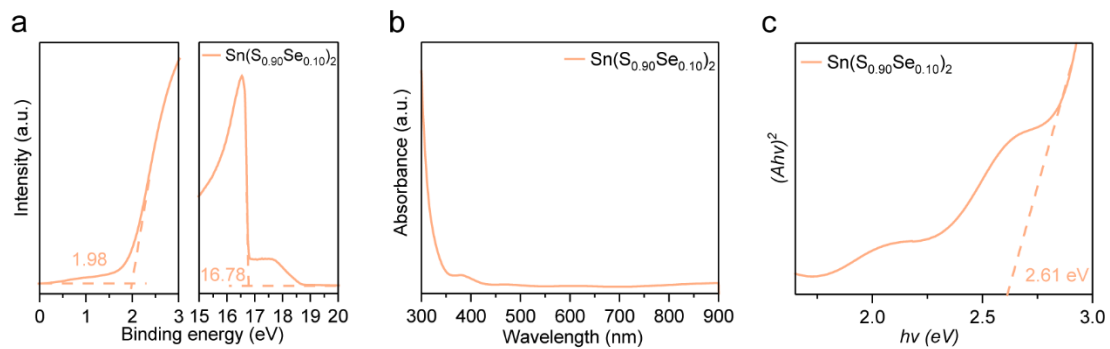

163

164 **Supplementary Fig. 21. UPS and UV-vis absorption spectra of the  $\text{Sn}(\text{S}_{0.90}\text{Se}_{0.10})_2$**   
 165 **ETL. a, UPS spectra, b, UV-vis absorption spectra, and c, Tauc plot of the**  
 166  **$\text{Sn}(\text{S}_{0.90}\text{Se}_{0.10})_2$  ETL.**

167

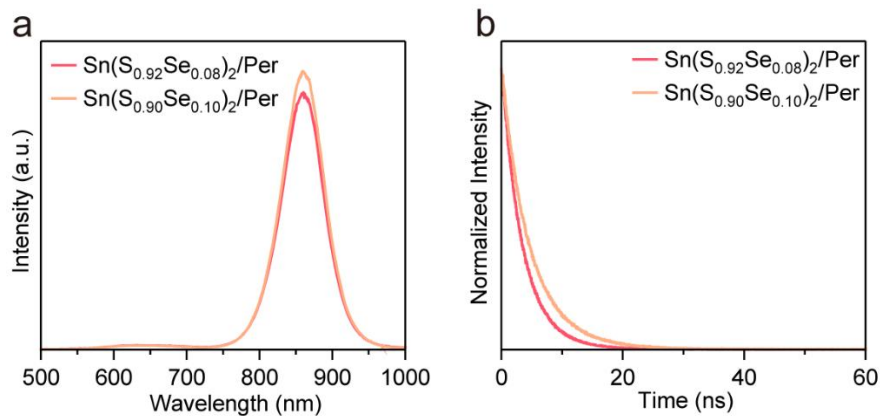

168

169 **Supplementary Fig. 22. PL and TRPL spectra. a**, PL and **b**, TRPL spectra of Sn-  
 170 based perovskite films deposited on  $\text{Sn}(\text{S}_{0.92}\text{Se}_{0.08})_2$  ETLs and  $\text{Sn}(\text{S}_{0.90}\text{Se}_{0.10})_2$  ETLs,  
 171 respectively. These results indicate more pronounced nonradiative interfacial  
 172 recombination between the Sn-based perovskite layer and the  $\text{Sn}(\text{S}_{0.90}\text{Se}_{0.10})_2$  ETL,  
 173 which suggests faster electron transfer in the structure of Sn-based perovskite films  
 174 deposited on  $\text{Sn}(\text{S}_{0.92}\text{Se}_{0.08})_2$  films.

175

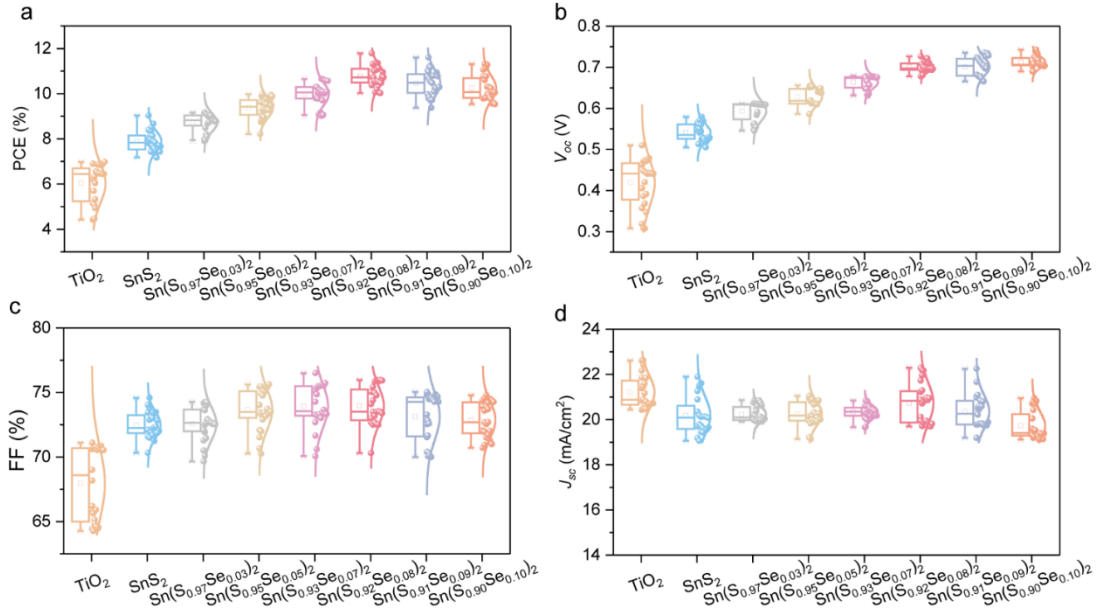

176

177

**Supplementary Fig. 23. Photovoltaic performance.** The statistics of photovoltaic

178

parameters of *nip*-type TPSCs, including **a**, PCE, **b**,  $V_{oc}$ , **c**, FF, and **d**,  $J_{sc}$ .

179

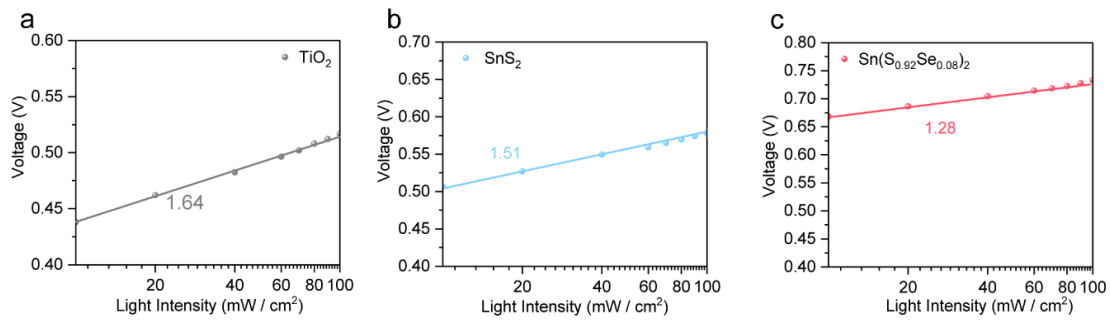

180

181 **Supplementary Fig. 24.** Linear relationship of  $V_{OC}$  to the light intensity of the *nip*-type

182 TPSCs with **a**,  $\text{TiO}_2$ , **b**,  $\text{SnS}_2$  and **c**,  $\text{Sn}(\text{S}_{0.92}\text{Se}_{0.08})_2$  ETLs, respectively.

183

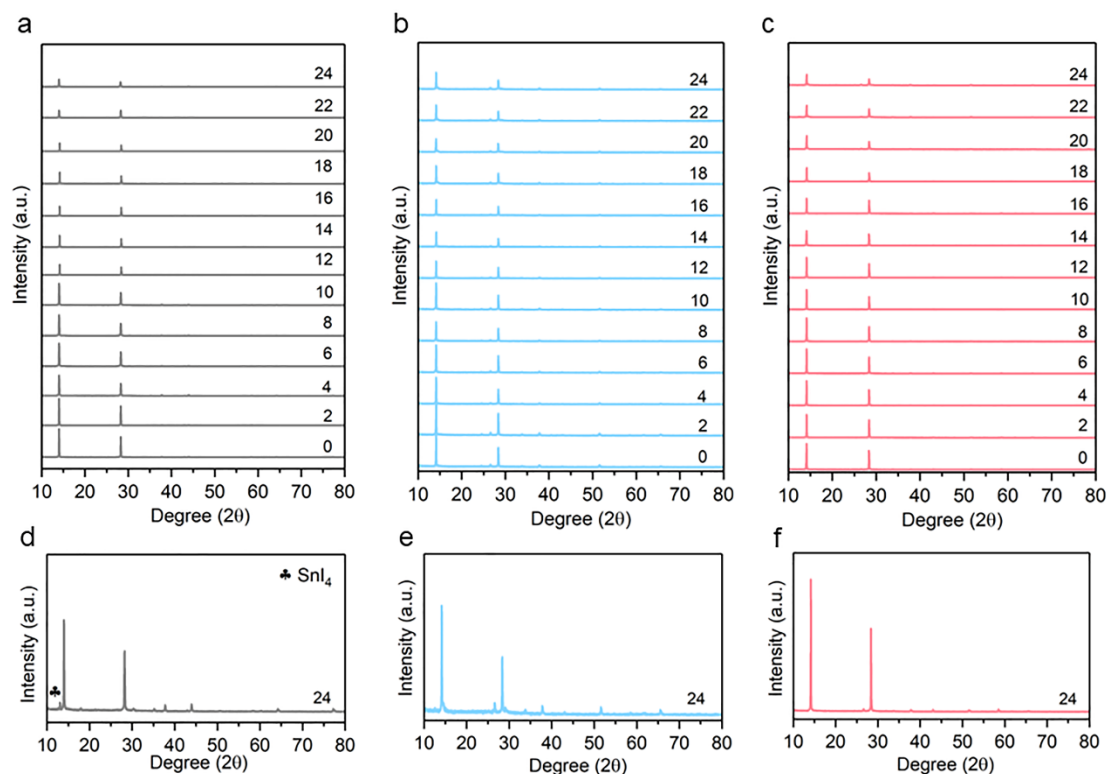

184

185 **Supplementary Fig. 25. XRD patterns.** XRD patterns of Sn-based perovskite layers

186 grown on **a**, TiO<sub>2</sub>, **b**, SnS<sub>2</sub> and **c**, Sn(S<sub>0.92</sub>Se<sub>0.08</sub>)<sub>2</sub> ETLs after aging a period of time in air.

187 The XRD patterns of Sn-based perovskite layers grown on **d**, TiO<sub>2</sub>, **e**, SnS<sub>2</sub> and **f**,

188 Sn(S<sub>0.92</sub>Se<sub>0.08</sub>)<sub>2</sub> ETLs after aging for 24 days were plotted individually.

189

190 **Supplementary Table 1.** Photovoltaic parameter comparison of this work and existing *nip*-type TPSCs.

| Devices                                                                                                                       | V <sub>oc</sub><br>(V) | J <sub>sc</sub><br>(mA cm <sup>-2</sup> ) | FF<br>(%)    | PCE<br>(%)   | Stability/Condition                                                                                                                                 | Year | Ref |
|-------------------------------------------------------------------------------------------------------------------------------|------------------------|-------------------------------------------|--------------|--------------|-----------------------------------------------------------------------------------------------------------------------------------------------------|------|-----|
| <b>FTO/Se-SnS<sub>2</sub>/PEA<sub>0.15</sub>FA<sub>0.85</sub>SnI<sub>2.85</sub>Br<sub>0.15</sub>-AET/PTAA/Ag</b>              | <b>0.73</b>            | <b>22.28</b>                              | <b>72.68</b> | <b>11.78</b> | <b>Maintaining 95% of its initial PCE for 1600 h/in a N<sub>2</sub> glovebox</b>                                                                    |      |     |
| FTO/c-TiO <sub>2</sub> /mp- TiO <sub>2</sub> /MASnI <sub>3</sub> /Spiro-OMeTAD/Au                                             | 0.88                   | 16.80                                     | 42.00        | 6.40         | —                                                                                                                                                   | 2014 | 1   |
| FTO/bl-TiO <sub>2</sub> /mp- TiO <sub>2</sub> /MASnI <sub>3</sub> /Spiro-OMeTAD/Au                                            | 0.68                   | 16.30                                     | 48.00        | 5.23         | Maintaining 64% of its initial PCE for 24 h/in a N <sub>2</sub> glovebox                                                                            | 2014 | 2   |
| FTO/c-TiO <sub>2</sub> /mp- TiO <sub>2</sub> /CsSnI <sub>3</sub> +SnF <sub>2</sub> /HTM/Au                                    | 0.24                   | 22.70                                     | 37.00        | 2.02         | —                                                                                                                                                   | 2014 | 3   |
| FTO/bl-TiO <sub>2</sub> /mp- TiO <sub>2</sub> /FASnI <sub>3</sub> +SnF <sub>2</sub> /Spiro-OMeTAD/Au                          | 0.24                   | 24.45                                     | 36.00        | 2.10         | —                                                                                                                                                   | 2015 | 4   |
| FTO/bl-TiO <sub>2</sub> /mp- TiO <sub>2</sub> /MASnI <sub>3</sub> /Au                                                         | 0.32                   | 21.40                                     | 46.00        | 3.15         | —                                                                                                                                                   | 2015 | 5   |
| FTO/bl-TiO <sub>2</sub> /mp- TiO <sub>2</sub> /FASnI <sub>3</sub> +SnF <sub>2</sub> +Pyrazine/spiro-OMeTAD/Au                 | 0.32                   | 23.70                                     | 63.00        | 4.80         | Maintaining 98% of its initial PCE for 100 days/with encapsulation                                                                                  | 2016 | 6   |
| FTO/TiO <sub>2</sub> /Al <sub>2</sub> O <sub>3</sub> /CsSnI <sub>3</sub> +SnF <sub>2</sub> +HPA/Carbon                        | 0.31                   | 17.40                                     | 57.00        | 3.20         | No significant decay for 77 days/with encapsulation                                                                                                 | 2016 | 7   |
| FTO/c-TiO <sub>2</sub> /mp- TiO <sub>2</sub> /CsSnBr <sub>3</sub> +N <sub>2</sub> H <sub>4</sub> /PTAA/Au                     | 0.38                   | 19.92                                     | 51.73        | 3.89         | —                                                                                                                                                   | 2017 | 8   |
| FTO/bl-TiO <sub>2</sub> /mp- TiO <sub>2</sub> /BA <sub>2</sub> MA <sub>3</sub> Sn <sub>4</sub> I <sub>13</sub> +TEP/PTAA/Au   | 0.23                   | 24.10                                     | 45.7         | 2.53         | Maintaining 90% of its initial PCE for 30 days/with encapsulation                                                                                   | 2017 | 9   |
| FTO/c-TiO <sub>2</sub> /mp- TiO <sub>2</sub> / {en}FASnI <sub>3</sub> /PTAA/Au                                                | 0.48                   | 22.54                                     | 65.96        | 7.14         | Maintaining 96% of its initial PCE for 1000 h/with encapsulation                                                                                    | 2017 | 10  |
| FTO/c-TiO <sub>2</sub> /mp- TiO <sub>2</sub> / {en}MASnI <sub>3</sub> /PTAA/Au                                                | 0.43                   | 24.28                                     | 63.72        | 6.63         | Maintaining ~60% of its initial efficiency for 10 min/constant illumination in air                                                                  | 2017 | 11  |
| FTO/c-TiO <sub>2</sub> /mp- TiO <sub>2</sub> /MASnI <sub>3</sub> +SnF <sub>2</sub> /Spiro-OMeTAD/Au                           | 0.45                   | 13.77                                     | 59.58        | 3.70         | Maintaining 80% of its initial PCE for 60 days/in a N <sub>2</sub> glovebox                                                                         | 2018 | 12  |
| FTO/TiO <sub>2</sub> /HEA <sub>0.4</sub> FA <sub>0.6</sub> Sn <sub>0.67</sub> I <sub>2.33</sub> /Carbon                       | 0.37                   | 18.52                                     | 56.20        | 3.90         | No significant decay for 100 h/in a N <sub>2</sub> glovebox                                                                                         | 2018 | 13  |
| ITO/nanoporous TiO <sub>2</sub> ZrO <sub>2</sub> /carbon/ (4AMP) (FA) <sub>3</sub> Sn <sub>4</sub> I <sub>13</sub>            | 0.64                   | 14.90                                     | 44.30        | 4.22         | Maintaining 91% of its initial PCE for 100 h/constant illumination in N <sub>2</sub> atmosphere at 45 °C                                            | 2018 | 14  |
| FTO/ c-TiO <sub>2</sub> /mp- TiO <sub>2</sub> /MASnI <sub>3</sub> /PTAA/Au                                                    | 0.49                   | 22.91                                     | 64.00        | 7.13         | —                                                                                                                                                   | 2019 | 15  |
| FTO/c-TiO <sub>2</sub> /mp- TiO <sub>2</sub> / {en}FASnI <sub>3</sub> /BDT-4D/Au                                              | 0.497                  | 22.41                                     | 68.21        | 7.59         | —                                                                                                                                                   | 2019 | 16  |
| FTO/bl-TiO <sub>2</sub> /mp- TiO <sub>2</sub> /BA <sub>2</sub> (FA) <sub>n-1</sub> Sn <sub>n</sub> I <sub>3n+1</sub> /PTAA/Au | 0.42                   | 23.98                                     | 40.21        | 4.04         | Maintaining 80% of its initial PCE for 14 days/in a N <sub>2</sub> glovebox                                                                         | 2020 | 17  |
| FTO/c-TiO <sub>2</sub> /mp- TiO <sub>2</sub> /CsSnI <sub>3</sub> +MBAA/P3HT/Ag                                                | 0.45                   | 24.85                                     | 67           | 7.5          | the average PCE of MBAA-modified devices maintained 60.2% of their original value after being stored under an inert RT condition for 1440 h         | 2021 | 18  |
| FTO/bl-TiO <sub>2</sub> /mp- TiO <sub>2</sub> /Cs <sub>0.1</sub> FA <sub>0.9</sub> SnI <sub>3</sub> +ThMAI/PTAA/Au            | 0.52                   | 24.12                                     | 72.02        | 9.06         | —                                                                                                                                                   | 2021 | 19  |
| FTO/bl-TiO <sub>2</sub> /mp- TiO <sub>2</sub> /FASnI <sub>3</sub> /Spiro-OMeTAD:DPI-TPFB/Au /Ag                               | 0.649                  | 23.59                                     | 71.25        | 10.9         | The encapsulated device retained 86% of its initial PCE after storing for 2832 h at room temperature (RT) in the dark with a humidity level of ~30% | 2023 | 20  |

191

192 **Supplementary Table 2.** The VBMs, CBMs, and bandgaps of the perovskite film,  
193 TiO<sub>2</sub> ETL, SnS<sub>2</sub> ETL, and Sn(S<sub>0.92</sub>Se<sub>0.08</sub>)<sub>2</sub> ETL, respectively.

|                                               | VBM (eV) | CBM (eV) | Bandgap (eV) |
|-----------------------------------------------|----------|----------|--------------|
| 194 Perovskite                                | -5.14    | -3.73    | 1.41         |
| 195 TiO <sub>2</sub>                          | -7.23    | -4.23    | 3.00         |
| 196 SnS <sub>2</sub>                          | -6.62    | -3.98    | 2.64         |
| 197 Sn(S <sub>0.92</sub> Se <sub>0.08</sub> ) | -6.43    | -3.83    | 2.60         |

198



199 **Supplementary Table 3.** The conductivities and mobilities of TiO<sub>2</sub>, SnS<sub>2</sub> and  
200 Sn(S<sub>0.92</sub>Se<sub>0.08</sub>)<sub>2</sub> films, respectively.

| Samples                                                                       | TiO <sub>2</sub> | SnS <sub>2</sub> | 8%-Se-SnS <sub>2</sub> |
|-------------------------------------------------------------------------------|------------------|------------------|------------------------|
| Conductivity (S cm <sup>-1</sup> x10 <sup>-3</sup> )                          | 8.41             | 12.7             | 13.8                   |
| Mobility (x10 <sup>-3</sup> cm <sup>2</sup> v <sup>-1</sup> s <sup>-1</sup> ) | 7.15             | 54.3             | 63.4                   |

201

202 **Supplementary Table 4.** The fitted data of TRPL characterization.

| Sample        | TiO <sub>2</sub> /Perovskite | SnS <sub>2</sub> /Perovskite | Sn(S <sub>0.92</sub> Se <sub>0.08</sub> ) <sub>2</sub> /Perovskite |
|---------------|------------------------------|------------------------------|--------------------------------------------------------------------|
| $\tau_1$ (ns) | 8.32                         | 6.65                         | 3.51                                                               |

203

204 **Supplementary Table 5.** Photovoltaic parameters of *nip*-type TPSCs based on TiO<sub>2</sub>,  
 205 SnS<sub>2</sub>, and Sn(S<sub>x</sub>Se<sub>y</sub>)<sub>2</sub> (y = 3%, 5%, 7%, 8%, 9% and 10%, x+y=1), respectively.

| Samples                                                |         | $V_{oc}$ (V) | $J_{sc}$ (mA/cm <sup>2</sup> ) | FF (%)     | Efficiency (%) |
|--------------------------------------------------------|---------|--------------|--------------------------------|------------|----------------|
| TiO <sub>2</sub>                                       | Best    | 0.48         | 20.47                          | 71.11      | 6.98           |
|                                                        | Average | 0.42±0.06    | 21.21±0.72                     | 67.96±2.80 | 6.03±0.86      |
| SnS <sub>2</sub>                                       | Best    | 0.57         | 21.89                          | 72.88      | 9.03           |
|                                                        | Average | 0.54±0.02    | 20.18±0.82                     | 72.48±0.99 | 7.89±0.45      |
| Sn(S <sub>0.97</sub> Se <sub>0.03</sub> ) <sub>2</sub> | Best    | 0.61         | 20.12                          | 74.45      | 9.17           |
|                                                        | Average | 0.59±0.02    | 20.24±0.33                     | 72.58±1.29 | 8.72±0.39      |
| Sn(S <sub>0.95</sub> Se <sub>0.05</sub> ) <sub>2</sub> | Best    | 0.65         | 20.02                          | 75.76      | 9.88           |
|                                                        | Average | 0.63±0.02    | 20.25±0.51                     | 73.68±1.55 | 9.37±0.43      |
| Sn(S <sub>0.93</sub> Se <sub>0.07</sub> ) <sub>2</sub> | Best    | 0.68         | 20.43                          | 76.52      | 10.58          |
|                                                        | Average | 0.66±0.02    | 20.33±0.29                     | 73.93±1.55 | 9.98±0.49      |
| Sn(S <sub>0.92</sub> Se <sub>0.08</sub> ) <sub>2</sub> | Best    | 0.73         | 22.28                          | 72.68      | 11.78          |
|                                                        | Average | 0.70±0.01    | 20.73±0.88                     | 73.97±1.47 | 10.77±0.47     |
| Sn(S <sub>0.91</sub> Se <sub>0.09</sub> ) <sub>2</sub> | Best    | 0.73         | 22.25                          | 71.54      | 11.60          |
|                                                        | Average | 0.70±0.02    | 20.35±0.71                     | 73.14±1.85 | 10.45±0.56     |
| Sn(S <sub>0.90</sub> Se <sub>0.10</sub> ) <sub>2</sub> | Best    | 0.74         | 20.42                          | 74.56      | 11.31          |
|                                                        | Average | 0.71±0.02    | 19.72±0.63                     | 72.89±1.35 | 10.24±0.55     |

206

## 207 **Supplementary References**

- 208 1. Noel, N. K. et al. Lead-free organic-inorganic tin halide perovskites for photovoltaic applications.  
209 *Energy Environ. Sci.* **7**, 3061–3068 (2014).
- 210 2. Hao, F. et al. Lead-free solid-state organic-inorganic halide perovskite solar cells. *Nat. Photon.* **8**,  
211 489–494 (2014).
- 212 3. Kumar, M. H. et al. Lead-free halide perovskite solar cells with high photocurrents realized  
213 through vacancy modulation. *Adv. Mater.* **26**, 7122–7127 (2014).
- 214 4. Koh, T. M. et al. Formamidinium tin-based perovskite with low  $E_g$  for photovoltaic applications.  
215 *J. Mater. Chem. A* **3**, 14996–15000 (2015).
- 216 5. Hao, F. et al. Solvent-mediated crystallization of  $\text{CH}_3\text{NH}_3\text{SnI}_3$  Films for heterojunction depleted  
217 perovskite solar cells. *J. Am. Chem. Soc.* **137**, 11445–11452 (2015).
- 218 6. Lee, S. J. et al. Fabrication of efficient formamidinium tin iodide perovskite solar cells through  
219  $\text{SnF}_2$ -pyrazine complex. *J. Am. Chem. Soc.* **138**, 3974–3977 (2016).
- 220 7. Li, W. et al. Additive-assisted construction of all-inorganic  $\text{CsSnI}_3\text{Br}_2$  mesoscopic perovskite  
221 solar cells with superior thermal stability up to 473 K. *J. Mater. Chem. A* **4**, 17104–17110 (2016).
- 222 8. Song, T. -B. et al. Importance of reducing vapor atmosphere in the fabrication of tin-based  
223 perovskite solar cells. *J. Am. Chem. Soc.* **139**, 836–842 (2017).
- 224 9. Cao, D. H. et al. Thin films and solar cells based on semiconducting two-dimensional  
225 Ruddlesden–Popper  $(\text{CH}_3(\text{CH}_2)_3\text{NH}_3)_2(\text{CH}_3\text{NH}_3)_{n-1}\text{SnI}_{3n+1}$  perovskites. *ACS Energy Lett.* **2**, 982–  
226 990 (2017).
- 227 10. Ke, W. et al. Enhanced photovoltaic performance and stability with a new type of hollow 3D  
228 perovskite  $\{\text{en}\}\text{FASnI}_3$ . *Sci. Adv.* **3**, e1701293 (2017).
- 229 11. Ke, W. et al. Efficient lead-free solar cells based on hollow  $\{\text{en}\}\text{MASnI}_3$  perovskites. *J. Am.*  
230 *Chem. Soc.* **139**, 14800–14806 (2017).
- 231 12. Xiao, M. et al. Tin-based perovskite with improved coverage and crystallinity through tin-  
232 fluoride-assisted heterogeneous nucleation. *Adv. Optical Mater.* **6**, 1700615 (2018).
- 233 13. Tsai, C. -M. et al. Control of crystal structures and optical properties with hybrid formamidinium  
234 and 2-hydroxyethylammonium cations for mesoscopic carbon-electrode tin-based perovskite solar  
235 cells. *ACS Energy Lett.* **3**, 2077–2085 (2018).
- 236 14. Chen, M. et al. Lead-free Dion–Jacobson tin halide perovskites for photovoltaics. *ACS Energy*  
237 *Lett.* **4**, 276–277 (2019).
- 238 15. Li, F. et al. A cation-exchange approach for the fabrication of efficient methylammonium tin  
239 iodide perovskite solar cells. *Angew. Chem. Int. Ed.* **58**, 6688–6692 (2019).
- 240 16. Vegiraju, S. et al. Benzodithiophene hole-transporting materials for efficient tin-based perovskite  
241 solar cells. *Adv. Funct. Mater.* **29**, 1905393 (2019).
- 242 17. Li, F. et al. Effects of alkyl chain length on crystal growth and oxidation process of two-  
243 dimensional tin halide perovskites. *ACS Energy Lett.* **5**, 1422–1429 (2020).
- 244 18. Tao, Y. et al. Ambient-air-stable lead-free  $\text{CsSnI}_3$  solar cells with greater than 7.5% efficiency.,  
245 *J. Am. Chem. Soc.* **143**, 4319–4328 (2021)
- 246 19. Hu, M. et al. Regulating the surface passivation and residual strain in pure tin perovskite films.  
247 *ACS Energy Lett.* **6**, 3555–3562 (2021).
- 248 20. Hu, M. et al. Highly stable n–i–p structured formamidinium tin triiodide solar cells through the  
249 stabilization of surface  $\text{Sn}^{2+}$  cations. *Adv. Funct. Mater.* **33**, 2300693 (2023).

250
